## CONSERVATION OF IMPERILED CRAYFISH—*ORCONECTES (FAXONIUS) INDIANENSIS* HAY (DECAPODA: CAMBARIDAE)

Thomas P. Simon and Roger F. Thoma

(TPS) U.S. Fish and Wildlife Service, 620 South Walker Street, Bloomington, IN 47403-2121, U.S.A; and  
Crustacean Collection, Aquatic Research Center, Indiana Biological Survey, 6440 South Fairfax Road,  
Bloomington, Indiana 47401, U.S.A. (thomas\_simon@fws.gov);  
(RFT) Crustacean Range, Museum of Biodiversity, The Ohio State University, 1351 Kinnear Drive,  
Columbus, Ohio 43212-1192, U.S.A. (bartonii@adelphia.com)

### INTRODUCTION

Common Name.—Indiana crayfish (Simon, 2001).

Conservation status.—Rare (Taylor et al., 1996). Based on the species' limited distribution (<20,000 km<sup>2</sup>) and the loss of populations, as reported in this study, *O. indianensis* has been classified as Vulnerable, VU B1b(iv), following IUCN (2001).

Identification.—The Indiana crayfish (Fig. 1), *Orconectes indianensis*, was first described by Hay (1896) from the Patoka River near the town of Patoka, Gibson County. The species is a member of the subgenus *Faxonius* and displays the subgenus' characteristic first form male gonopod having both a short mesial process and central projection. The two rami are strongly divergent in both first and second form males, the rostrum is fixed with a median, distal carina, a strongly developed cervical spine is found on each side of the cervical groove, and the annulus ventralis displays bilateral anterior knobs.

### NATURAL HISTORY

Distribution.—The geographic range of *Orconectes indianensis* is restricted (Fig. 2) and has been considered “Rare” or “Special Concern” (Page, 1985; Page, 1994; Simon, 2001; Taylor et al., 1996). Hobbs (1989) reports that the species is endemic to southeastern Illinois and southwestern Indiana, but it has been extirpated from a large portion of its historic range in Illinois (Page, 1985; Page, 1994) and has been reported from very few sites in Indiana (Hay, 1896; Eberly, 1955; Page and Mottes, 1995).

Rhoades (1962) described the historic and current range of *O. indianensis* in relation to glaciation. The species was considered to have been present throughout the entire Wabash River drainage and the dominant crayfish in the White River prior to the Illinoian glacier. The farthest advance of the Illinoian glacier filled the lower White River drainage causing changes at the ice front as it formed three marginal lakes that supported *O. indianensis* populations. Effluents later connected the three lakes and formed the Patoka River and other Illinoian drainages, the Little Pigeon and Anderson River drainages. The Wisconsin glacier did not have an effect on the distribution of the species (Rhoades, 1962).

The first records of *O. indianensis* from Illinois were reported by Rietz (1912). However, some of the localities

cited in his study are believed based on misidentification as one of two other species (Page, 1985), i.e., *Orconectes stannardi* Page, 1985 and *O. propinquus* (Girard, 1852). Records for the South Fork Saline River in Gallatin County and the North Fork Saline River in Saline County are considered valid, but additional records for the North Fork Saline River remain unverified. Brown (1955) provided additional distribution records for *O. indianensis* in Cypress Ditch, Gallatin County. Page (1985) found a similar distribution for the species reported by Brown (1955) during a statewide survey in Illinois from 1972 to 1982. Additional records were found for Williamson, Johnson, Saline, Pope, and Gallatin Counties, and Ohio River drainages in Hardin County. Additional records for Sugar Creek (Saline River drainage) in Williamson County, and Brushy Slough (Ohio River drainage) in White County were found in museum collections. In 1993, Page (1994) sampled the same sites in Illinois where historical collections had been made. The species was found at all but three sites sampled during 1993 as they were during 1972-1982. The species was not collected from Rock Creek (Hardin County), Rock Branch Battle Fork Creek (Saline County), and Brushy Slough (White County). Page (1994) stated that although the Illinois population does not appear to be declining, the reduction of the species' historical range and threats to the main population requires State protection. In Illinois, the species is stable but remains in a precarious state, since the majority of populations are found in the Saline River system, now degraded by oil and gas exploration, coal mining, and acid mine drainage (Smith, 1971; Page, 1994; Simon et al., 1995). *Orconectes indianensis* significant range reduction is a result of changing land use (Smith, 1971; Page, 1995).

In Indiana, *Orconectes indianensis* is found in extreme southwestern Indiana in the Patoka River system, a tributary of the Wabash River; in the Black River, a small tributary of the Wabash River in Posey County; and in Ohio River tributaries from Pigeon Creek, Vanderburgh County to Anderson River in Perry County (Page, 1994; Page and Mottes, 1995). Page (1994) indicated that the Patoka River was one of the last remaining watersheds that possessed populations of *O. indianensis*. Several studies indicate that this watershed is at risk of degradation similar to that in the Saline River watershed in Illinois (Simon et al., 1995; Simon et al., 2005). We confirmed that *O. indianensis* distribution is currently limited to the Patoka and Black

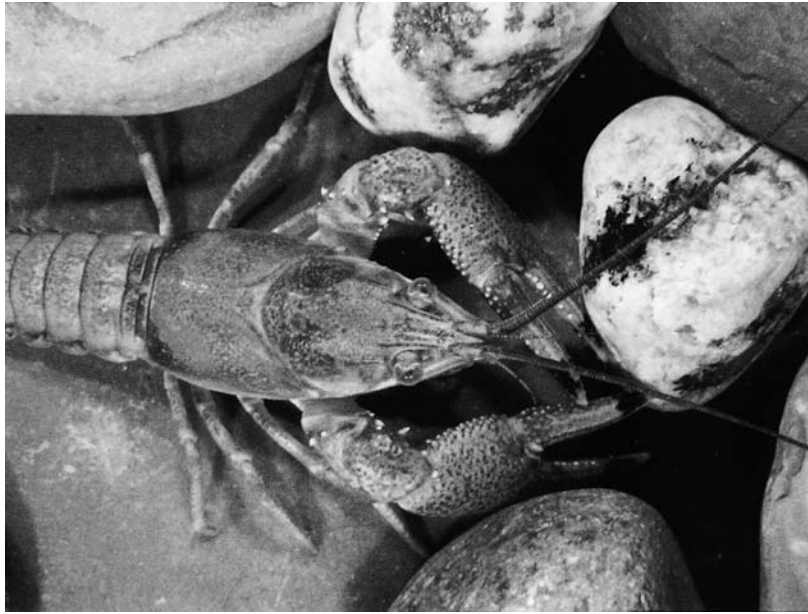

Fig. 1. *Orconectes indianensis* Hay in rock habitat.

River systems (Wabash River drainages) and Pigeon Creek and Anderson River (Ohio River drainage) in southwestern Indiana and the Saline River and Honey Creek systems (Ohio River drainage) in southeastern Illinois. These six basins encompass approximately 2200 km<sup>2</sup> total drainage area. Hay (1896) first described the species from the Patoka River, Gibson County, Indiana. Rhoades (1962) reported collecting specimens in the Patoka River from Gibson, Pike, Dubois, and Orange Counties; the Little Pigeon River, Warrick County; and Anderson River, Perry County, Indiana. Specimens were also found by Page (1994) in the United States National Museum, The Ohio State Museum of Biodiversity, and the Illinois Natural History Survey. These new museum collections validate records for Spencer, Posey, and Vanderburgh Counties. Page (1994) reported that *O. indianensis* was extirpated from Gibson and Dubois Counties; however, our surveys during 2001-2003 found that the species is still extant in these areas. Page (1994) believed that the species status was stable in Indiana. Surveys conducted in Indiana during 2001-2003 found additional localities in the upper Patoka River on public lands (Fig. 2.1). Individuals of *O. indianensis* were found at 42 sites (34.4% of 125 sites collected); however, only two of the historic sites surveyed by Page (1994) retained populations.

**Abundance.**—The relative abundance of *O. indianensis* is high (0.76 individuals/m<sup>2</sup>) in streams with cobble, rubble bottoms ( $R = 0.259$ ) and low sediment loads, and absent or low abundance having only 1-2 individuals in heavily sedimented streams (Fig. 2.2). Smaller headwater and intermittent streams produced the largest numbers of crayfish. The largest number of *O. indianensis* collected at a single site was 106 individuals (0.707 crayfish/m<sup>2</sup>).

**Habitat and ecology.**—*Orconectes indianensis* inhabits streams with coarse substrates primarily of large rocks or woody debris, and slow to moderate current (Page, 1985; Page, 1994). Our studies found *Orconectes indianensis* to

prefer high gradient streams having riffles, runs, and pools with clear water of moderate nutrient levels. Presence of *O. indianensis* is strongly correlated with the presence of rock cobble or boulder habitat (Table 1). The preferred stream size includes perennial headwater and intermittent streams; however, the species also occurs in the main channel of the Patoka River at the type locality and further downstream near the mouth of the Patoka River near the confluence with the Wabash River. This extensively channelized site, characterized by riffle habitat, is uncharacteristic of the lower Patoka River. The species has not been collected from areas that are heavily silted, which is especially common in channelized stream reaches. *Orconectes indianensis* is a tertiary burrower (Hobbs, 1981) constructing simple chambers under rocks during the warmer, dry months of the year.

**Reproduction.**—Page (1985) recorded the presence of ovigerous females during April and May. We observed first form males and females (Wetzel, 2002) during only a short reproductive season in late fall and early spring. Two ovigerous females carried 81 and 9 eggs total and five females with attached instars carried 16 to 108 individuals ( $\bar{x} = 36.8$ ).

#### CONSERVATION FACTORS

**Threats.**—Stream modifications, especially channelization; increased nutrient and sediment loads; strip mining activities and their consequent influence on pH changes threaten this species. The North and Middle Forks of the Saline River are extremely polluted as a result of water quality degradation from strip-mining, oil-field pollution, siltation, and desiccation (Smith, 1971). Rhoades (1962) suggested that the Patoka River was the stronghold for the species. Currently, coal mining, stream channel clearing, channelization, and poor water quality threaten this watershed. In the Patoka River drainage, eight of the eleven sites sampled by Page (1994) failed to provide continued

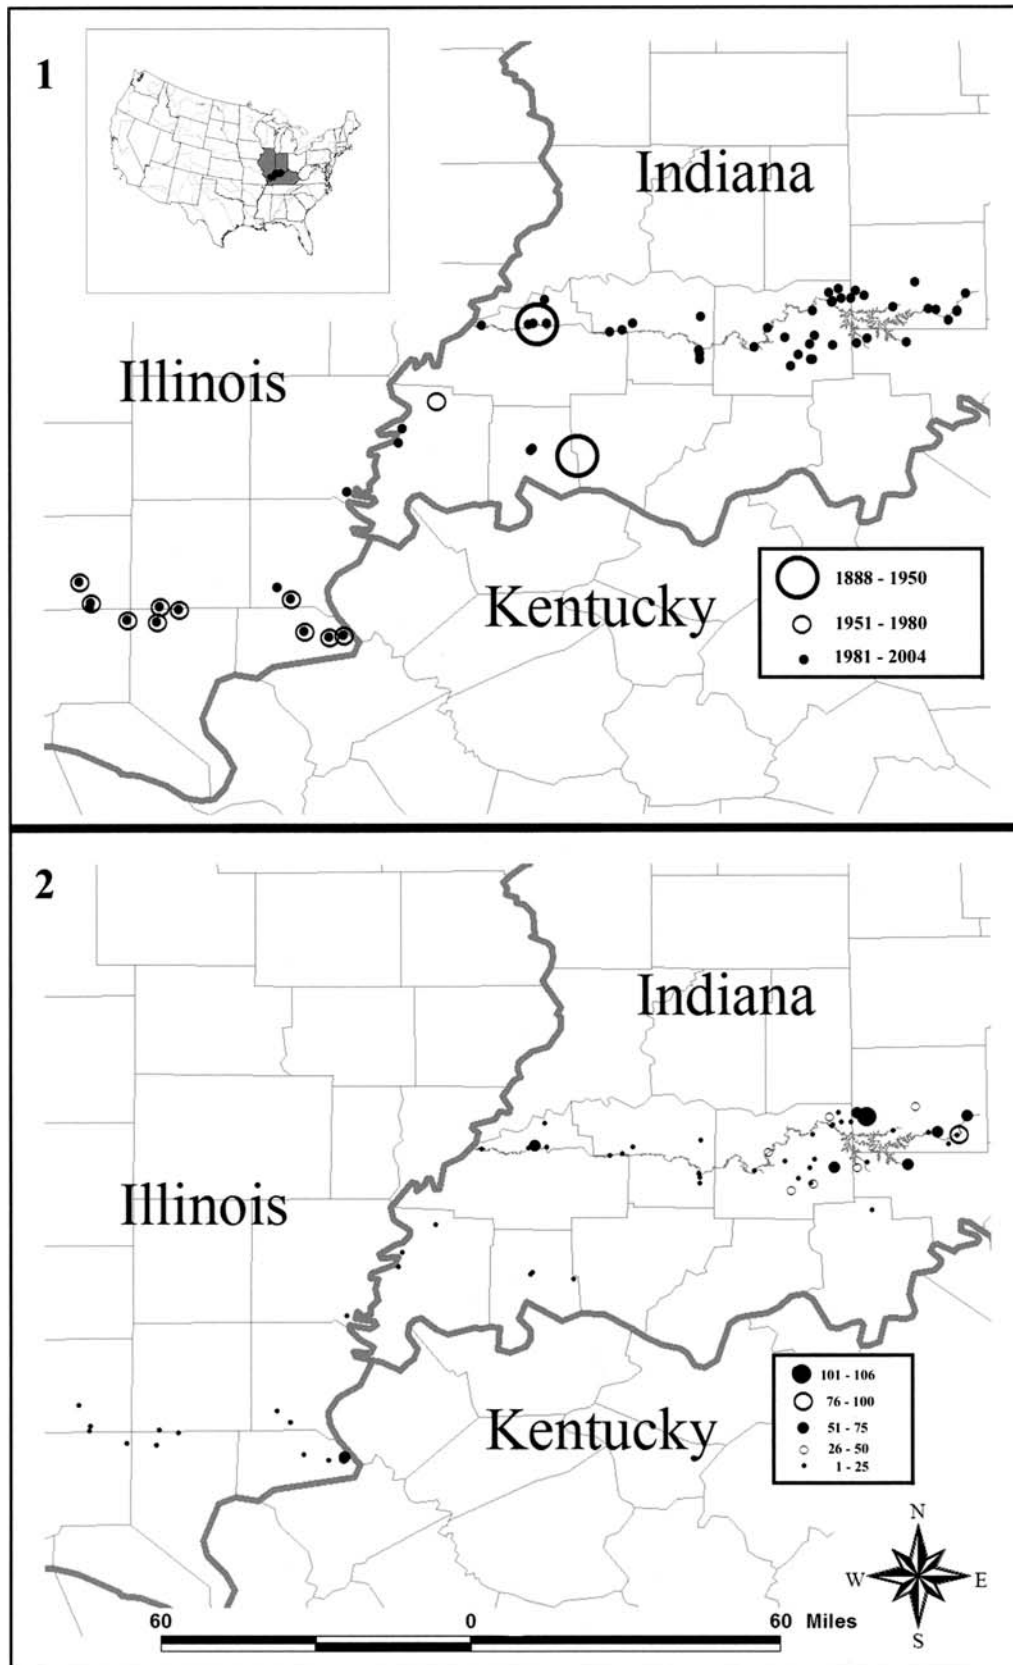

Fig. 2. 1) Present and historical distribution of *Orconectes indianensis* Hay in Illinois and Indiana. Large open circles = 1950 and earlier; medium open circles = 1951-1980; solid circles = 1981-2004. 2) Abundance of *Orconectes indianensis* Hay in Illinois and Indiana. Increasing dot size represents increasing relative abundance captured at each site. Small solid dots = 1-25 crayfish; medium hollow dots = 26-50 crayfish; medium solid dots = 51-75 crayfish; large hollow dots = 76-100 crayfish; and large solid dots = 101-106 crayfish.

Table 1. Correlations of environmental variables with *Orconectes indianensis* abundance. All variables are significant at  $P < 0.05$ ,  $N = 133$ .

|                                 | Correlation |
|---------------------------------|-------------|
| Positively correlated variables |             |
| Riffle score                    | 0.315       |
| Substrate score                 | 0.304       |
| QHEI                            | 0.300       |
| Cover score                     | 0.285       |
| Overhanging vegetation          | 0.269       |
| Number of substrate types       | 0.264       |
| % Boulder/cobble                | 0.259       |
| Gravel                          | 0.253       |
| Limestone                       | 0.252       |
| No embeddedness                 | 0.243       |
| Moderate sinuosity              | 0.225       |
| No channelization               | 0.224       |
| Riffle depth 10-50 cm           | 0.223       |
| Riffle embeddedness             | 0.222       |
| Gradient                        | 0.221       |
| Pool score                      | 0.219       |
| pH                              | 0.215       |
| Stream development good         | 0.214       |
| Channel score                   | 0.212       |
| Riffles stable                  | 0.211       |
| Cobble                          | 0.206       |
| Pool depth >100 cm              | 0.197       |
| Temperature                     | 0.197       |
| Boulder cobble cover            | 0.184       |
| Narrow riparian                 | 0.179       |
| Negatively correlated variables |             |
| Specific conductivity           | -0.172      |
| Salinity                        | -0.174      |
| Recent channelization           | -0.180      |
| Poor stream development         | -0.199      |
| Sparse cover                    | -0.200      |
| Silt abundance                  | -0.205      |
| Cover lacking                   | -0.206      |
| Bank erosion heavy              | -0.207      |
| No riffles                      | -0.217      |
| Silt heavy                      | -0.220      |
| Extensive embeddedness          | -0.227      |
| Low streambed stability         | -0.230      |
| No sinuosity                    | -0.237      |
| Riffles unstable                | -0.245      |

evidence of *O. indianensis* during our 2001-2003 surveys. Two of the eight sites were badly polluted. Efforts by the Patoka National Wildlife Refuge to reduce water quality impacts of acid mine drainage and oil brine along the perimeter of the Refuge should increase available habitat. *Orconectes rusticus* (Girard, 1852) invasion of streams occupied by *O. indianensis* will likely result in drastic reductions of *O. indianensis* and confinement of populations to a few small, low nutrient headwater streams in the basin.

Conservation action.—*Orconectes indianensis* is presently not considered Federal Endangered and is not state listed by Indiana (Simon, 2001). Page (1994) reported that a total of 18 historic localities were sampled in both Indiana and Illinois in 1993. Six of the sites no longer have documented populations, three have declining populations, and 9 have stable populations. Sites sampled during 2001-2003 showed that only two of the nine sites previously possessing Indiana crayfish remained stable in Indiana. The remaining sites no longer support populations (Simon and Thoma, 2003). This loss of historic populations is a troubling trend for the future of the species.

*Orconectes indianensis* has a narrow distribution and large areas of its range have been impacted in ways that have greatly reduced its abundance. Further non-point impacts and habitat modifications will further reduce the abundance of *O. indianensis* and the establishment of the rusty crayfish (*O. rusticus*) could cause the species to slip into the endangered range. Continued monitoring of the species is required to maintain knowledge of its status.

Conservation recommendations.—Streams with suitable water quality would benefit from the placement of rock-rubble substrates in the stream. The addition of rock-rubble substrates will greatly enhance the potential for establishment and expansion of *O. indianensis* populations. Prevention of non-point run off by employing wooded and grassed buffer strips on stream and ditch edges will also enhance *O. indianensis* habitat. Further efforts to secure additional public lands along the edges of Hoosier National Forest, the U.S. Fish and Wildlife Service Patoka River National Wildlife Refuge, and land owned by the Army Corps of Engineers would benefit the long-term stability of this species.

Remarks.—*Orconectes indianensis* was found to be more widely distributed and more abundant than initially considered prior to conducting this survey (Fig. 2.2). New populations found during surveys conducted during 2001-2003 in the headwaters of the Patoka River drainage include numerous sites in Hoosier National Forest, Patoka National Wildlife Refuge, and on public land owned by the Army Corps of Engineers. It does not meet criteria to be designated Federal Endangered. Threats posed by potential introduction of rusty crayfish to streams inhabited by *O. indianensis* are considered to be extreme. Similar to populations of *Orconectes propinquus* or *Orconectes sanbornii* (Faxon, 1884) observed in Ohio (Thoma and Jezerinac, 2000), *O. indianensis* shows a propensity to prosper in small first order streams with low nutrient levels. Such areas in Ohio have proven to be important refuges for the two species as *O. rusticus* does not prosper in waters low in nutrient that lack aquatic plant growth such as filamentous algae (Thoma and Jezerinac, 2000).

## CONCLUSIONS

The status of *Orconectes indianensis* is more secure than previously thought in Indiana and remains stable in Illinois (Page, 1994; Page and Mottesi, 1995; Simon and Thoma, 2003). This species has remained stable in Illinois despite widespread degradation in the Saline and Patoka River drainages. We noted absence of the species in sites where populations were previously reported. We found populations at 27 additional new sites in the headwaters of the Patoka River. Habitat enhancement for *O. indianensis* can be facilitated by increasing rock-rubble coverage of stream bottoms and reducing the coverage of silt and sand. Establishment of wooded riparian cover would prove to be beneficial to this species. Establishment of *O. rusticus* populations in stream basins with *O. indianensis* should be immediately and completely eliminated.

## ACKNOWLEDGEMENTS

The authors thank Foster Purrington for field and laboratory assistance in the collection and processing of specimens from this study. This study was funded through the U.S. Fish and Wildlife Service Contaminants program through grant number 31440-1261-3N29 to TPS. The opinions expressed do not necessarily represent those of the U.S. Fish and Wildlife Service although this study may have been funded entirely or in part by that agency.

## REFERENCES

- Brown, P. L. 1955. The biology of the crayfishes of central and south-eastern Illinois. Doctoral dissertation, University of Illinois, Urbana-Champaign.
- Hay, W. P. 1896. The crayfishes of the State of Indiana. 20<sup>th</sup> Annual Report of the Department of Geology and Natural Resources of Indiana 1896: 476-506.
- Hobbs, H. H. Jr. 1981. The Crayfishes of Georgia. Smithsonian Contributions to Zoology, 318: viii + 549 pp, figs 1-262.
- . 1989. An illustrated checklist of the American crayfishes (Decapoda: Astacidae, Cambaridae, and Parastacidae). Smithsonian Contributions to Zoology 480. 236 pp.
- IUCN. 2001. IUCN Red List Categories and Criteria: Version 3.1. IUCN Species Survival Commission. IUCN, Gland, Switzerland and Cambridge, UK. ii + 30 pp.
- Page, L. M. 1985. The crayfishes and shrimps (Decapoda) of Illinois. Illinois Natural History Survey Bulletin 33: 335-448.
- . 1994. The distribution and status of the Indiana crayfish, *Orconectes indianensis*. Illinois Natural History Survey, Champaign. Technical Report 1994(2).
- , and G. B. Mottes. 1995. The distribution and status of the Indiana crayfish, *Orconectes indianensis*, with comments of the crayfishes of Indiana. Proceedings of the Indiana Academy of Science 104: 103-111.
- Rhoades, R. 1962. The evolution of crayfishes of the genus *Orconectes* section *Limosus* (Crustacea: Decapoda). The Ohio Journal of Science 62: 65-96.
- Rietz, N. M. 1912. Ecological relations of the crawfishes of Illinois. Bachelor's thesis, University of Illinois, Urbana-Champaign.
- Simon, T. P. 2001. Checklist of the crayfish and freshwater shrimp (Decapoda) of Indiana. Proceedings of the Indiana Academy of Science 110: 104-110.
- , R. L. Dufour, and B. E. Fisher. 2005. Changes in the biological integrity of fish communities in the Patoka River drainage as a result of anthropogenic disturbance from 1888 to 2001, pp. 245-257. In, Changes in the Biology of Large Rivers. Historical Changes in Large River Fish Assemblages of North America. R. M. Hughes, J. Rinne, and R. Calamusso (eds.). American Fisheries Society, Bethesda, Maryland.
- , S. A. Sobiech, T. H. Cervone, and N. E. Morales. 1995. Historical and present distribution of fishes in the Patoka River basin: Pike, Gibson, and Dubois Counties, Indiana. Proceedings of the Indiana Academy of Science 104: 193-206.
- , and R. F. Thoma. 2003. Distribution patterns of freshwater shrimp and crayfish (Decapoda: Cambaridae) in the Patoka River basin of Indiana. Proceedings of the Indiana Academy of Science 112: 175-185.
- Smith, P. W. 1971. Illinois Streams: a classification based on their fishes and an analysis of factors responsible for disappearance of native species. Illinois Natural History Survey Biological Notes 76.
- Taylor, C. A., M. L. Warren Jr., J. F. Fitzpatrick, H. H. Hobbs III, R. F. Jezerinac, W. L. Pflieger, and H. W. Robison. 1996. Conservation status of crayfishes of the United States and Canada. Fisheries 21(4): 25-38.
- Wetzel, J. E. 2002. Form alteration of adult female crayfishes of the genus *Orconectes* (Decapoda: Cambaridae). American Midland Naturalist 147: 326-337.

RECEIVED: 16 August 2005.

ACCEPTED: 20 January 2005.
